# Supplementary material for: Cellular deconvolution of GTEx tissues powers discovery of disease and cell-type associated regulatory variants
Source: PubMed Central journal article supplement (PMC7031340; doi:10.1038/s41467-020-14561-0), 2020-02-19
Supplement: 41467_2020_14561_MOESM28_ESM.pdf [file 41467_2020_14561_MOESM28_ESM.pdf]

### **Title: Supplementary Data 1**

#### **Description: Signature genes from cell populations identified in 14 scRNA-seq tissues**

For each scRNA-seq dataset (14 organs from mouse and two tissues from human) used to deconvolute GTEx tissues, we extracted signature genes. In Supplementary Data 1A, for each organ/tissue, (Column A), species (Column B), cell type (Column C), the signature gene ensemble IDs (signature\_gene\_ids; Column D) are given. In subsequent tables (Supplementary Data 1B-Q), the mean signature gene expressions from each cell type comprising each organ/tissue/species dataset are given.

### **Title: Supplementary Data 2**

#### **Description: Correlation of cell type estimates obtained from human versus mouse expression signatures**

The table shows, for each combination of cell type from human (column A) and mouse (column B), the observed correlation (column C), the mean and standard deviation of correlations in 1,000 permutations (column D, E), the Z-score (calculated as the difference between observed correlation and mean correlation in the permutations, divided by the standard deviation, column F), the empirical p-value (calculated using as the number of permutations with correlation greater than the observed value, divided by the number of permutations + 1, column G) and the Benjamini-Hochberg-adjusted p-value (column H). Panel A shows liver cell types, while panel B shows skin cell types.

### **Title: Supplementary Data 3**

#### **Description: Simulation analysis to examine accuracy of deconvolution using human and mouse signature genes**

To examine the accuracy of the deconvolution using both human and mouse signature genes, we used human liver scRNA-seq data to obtain 100 simulated samples with known cell type distributions. The table shows, for each simulated sample: 1) the number of cells from each cell type used to obtain the mixture (column B-P); 2) the cell type estimates using human expression signatures (column Q-AE); 3) cell type estimates using mouse expression signatures (column AF-AJ); 4) known collapsed cell type distributions (column AK-AQ); and 5) cell type estimates using human collapsed expression signatures (column AR-AX). For the known cell type distributions the number of cells is shown, while for the cell type estimates the relative distributions are displayed.

**Title: Supplementary Data 4**

**Description: Cellular composition estimates of bulk RNA-seq from GTEx Artery (Aorta) using mouse aorta signature genes**

**Title: Supplementary Data 5**

**Description: Cellular composition estimates of bulk RNA-seq from GTEx Heart (Atrial appendage) using mouse heart (subsetting to atrium cells) signature genes**

Input Sample (Column A) indicates the deconvoluted GTEx RNA-seq sample. Subsequent columns indicate the fraction of each estimated cell populations, and CIBERSORT p-value.

**Title: Supplementary Data 6**

**Description: Cellular composition estimates of bulk RNA-seq from GTEx Brain (Amygdala, Anterior cingulate cortex (BA24), Caudate (basal ganglia), Cerebellar Hemisphere, Cerebellum, Cortex, Frontal Cortex (BA9), Hippocampus, Hypothalamus, Nucleus accumbens (basal ganglia), Putamen (basal ganglia), Spinal cord (cervical c-1), Substantia nigra) using mouse brain non-microglia signature genes**

Input Sample (Column A) indicates the deconvoluted GTEx RNA-seq sample. Subsequent columns indicate the fraction of each estimated cell populations, and CIBERSORT p-value.

**Title: Supplementary Data 7**

**Description: Cellular composition estimates of bulk RNA-seq from GTEx Colon (Sigmoid and transverse) using mouse colon signature genes**

Input Sample (Column A) indicates the deconvoluted GTEx RNA-seq sample. Subsequent columns indicate the fraction of each estimated cell populations, and CIBERSORT p-value.

**Title: Supplementary Data 8**

**Description: Cellular composition estimates of bulk RNA-seq from GTEx Adipose (Subcutaneous, Visceral (Omentum)) using mouse fat signature genes**

Input Sample (Column A) indicates the deconvoluted GTEx RNA-seq sample. Subsequent columns indicate the fraction of each estimated cell populations, and CIBERSORT p-value.

**Title: Supplementary Data 9**

**Description: Cellular composition estimates of bulk RNA-seq from GTEx Liver using human liver signature genes**

Input Sample (Column A) indicates the deconvoluted GTEx RNA-seq sample. Subsequent columns indicate the fraction of each estimated cell populations, and CIBERSORT p-value.

**Title: Supplementary Data 10**

**Description: Cellular composition estimates of bulk RNA-seq from GTEx Liver using mouse liver signature genes**

Input Sample (Column A) indicates the deconvoluted GTEx RNA-seq sample. Subsequent columns indicate the fraction of each estimated cell populations, and CIBERSORT p-value.

**Title: Supplementary Data 11**

**Description: Cellular composition estimates of bulk RNA-seq from GTEx Breast (mammary) using mouse mammary signature genes**

Input Sample (Column A) indicates the deconvoluted GTEx RNA-seq sample. Subsequent columns indicate the fraction of each estimated cell populations, and CIBERSORT p-value.

**Title: Supplementary Data 12**

**Description: Cellular composition estimates of bulk RNA-seq from GTEx Muscle (skeletal muscle) using mouse muscle signature genes**

Input Sample (Column A) indicates the deconvoluted GTEx RNA-seq sample. Subsequent columns indicate the fraction of each estimated cell populations, and CIBERSORT p-value.

**Title: Supplementary Data 13**

**Description: Cellular composition estimates of bulk RNA-seq from GTEx Pancreas using mouse pancreas signature genes**

Input Sample (Column A) indicates the deconvoluted GTEx RNA-seq sample. Subsequent columns indicate the fraction of each estimated cell populations, and CIBERSORT p-value.

**Title: Supplementary Data 14**

**Description: Cellular composition estimates of bulk RNA-seq from GTEx Skin (Not sun exposed (Suprapubic), Sun exposed (Lower leg)) using mouse skin signature genes**

Input Sample (Column A) indicates the deconvoluted GTEx RNA-seq sample. Subsequent columns indicate the fraction of each estimated cell populations, and CIBERSORT p-value.

**Title: Supplementary Data 15**

**Description: Cellular composition estimates of bulk RNA-seq from GTEx Skin (Not sun exposed (Suprapubic), Sun exposed (Lower leg)) using human epidermis signature genes**

Input Sample (Column A) indicates the deconvoluted GTEx RNA-seq sample. Subsequent columns indicate the fraction of each estimated cell populations, and CIBERSORT p-value.

**Title: Supplementary Data 16**

**Description: Cellular composition estimates of bulk RNA-seq from GTEx Spleen using mouse spleen signature genes**

Input Sample (Column A) indicates the deconvoluted GTEx RNA-seq sample. Subsequent columns indicate the fraction of each estimated cell populations, and CIBERSORT p-value.

**Title: Supplementary Data 17**

**Description: Cellular composition estimates of bulk RNA-seq from GTEx Heart (Left ventricle) using mouse heart (subsetting to ventricle cells) signature genes**

Input Sample (Column A) indicates the deconvoluted GTEx RNA-seq sample. Subsequent columns indicate the fraction of each estimated cell populations, and CIBERSORT p-value.

**Title: Supplementary Data 18**

**Description: eQTL results: GTEx liver at bulk resolution**

The ensemble gene ID (Column A), the gene name (Column B), the start (Column C) and end (Column D) of the gene, the gene ID (chromosome\_start\_end\_genotype; Column E), variant position (Column F), reference allele (Column G), alternative allele (Column H), the reference SNP cluster ID (Column I), delta AIC (Column J) and p-value (Column K) for covariates included in the model, and FDR (Column L) are included.

**Title: Supplementary Data 19**

**Description: eQTL results: GTEx liver at high resolution**

The ensemble gene ID (Column A), the gene name (Column B), the start (Column C) and end (Column D) of the gene, the gene ID (chromosome\_start\_end\_genotype; Column E), variant position (Column F), reference

allele (Column G), alternative allele (Column H), the reference SNP cluster ID (Column I), delta AIC (Column J) and p-value (Column K) for covariates included in the model, and FDR (Column L) are included.

**Title: Supplementary Data 20**

**Description: eQTL results: GTEx liver at collapsed resolution**

The ensemble gene ID (Column A), the gene name (Column B), the start (Column C) and end (Column D) of the gene, the gene ID (chromosome\_start\_end\_genotype; Column E), variant position (Column F), reference allele (Column G), alternative allele (Column H), the reference SNP cluster ID (Column I), delta AIC (Column J) and p-value (Column K) for covariates included in the model, and FDR (Column L) are included.

**Title: Supplementary Data 21**

**Description: eQTL results: GTEx liver at low resolution**

The ensemble gene ID (Column A), the gene name (Column B), the start (Column C) and end (Column D) of the gene, the gene ID (chromosome\_start\_end\_genotype; Column E), variant position (Column F), reference allele (Column G), alternative allele (Column H), the reference SNP cluster ID (Column I), delta AIC (Column J) and p-value (Column K) for covariates included in the model, and FDR (Column L) are included.

**Title: Supplementary Data 22**

**Description: eQTL results: GTEx skin at bulk resolution**

The ensemble gene ID (Column A), the gene name (Column B), the start (Column C) and end (Column D) of the gene, the gene ID (chromosome\_start\_end\_genotype; Column E), variant position (Column F), reference allele (Column G), alternative allele (Column H), the reference SNP cluster ID (Column I), delta AIC (Column J) and p-value (Column K) for covariates included in the model, and FDR (Column L) are included.

**Title: Supplementary Data 23**

**Description: eQTL results: GTEx skin at high resolution**

The ensemble gene ID (Column A), the gene name (Column B), the start (Column C) and end (Column D) of the gene, the gene ID (chromosome\_start\_end\_genotype; Column E), variant position (Column F), reference allele (Column G), alternative allele (Column H), the reference SNP cluster ID (Column I), delta AIC (Column J) and p-value (Column K) for covariates included in the model, and FDR (Column L) are included.

**Title: Supplementary Data 24**

**Description: eQTL results: GTEx skin at collapsed resolution**

The ensemble gene ID (Column A), the gene name (Column B), the start (Column C) and end (Column D) of the gene, the gene ID (chromosome\_start\_end\_genotype; Column E), variant position (Column F), reference allele (Column G), alternative allele (Column H), the reference SNP cluster ID (Column I), delta AIC (Column J) and p-value (Column K) for covariates included in the model, and FDR (Column L) are included.

**Title: Supplementary Data 25**

**Description: Skin eQTL colocalization with skin GWAS traits results**

For each of the 23 UK Biobank GWAS traits (Column A) that was colocalized with the eQTLs identified using six collapsed skin populations, we provide a description of the trait (Column B) and how we collapsed results from similar studies (Column C). This table further describes the gene ensemble IDs (Column D), the SNP ID (chromosome\_start\_end\_genotype; Column E), and the number of SNPS tested for each gene (Column F). Results of the colocalization include the posterior probability of the model not sharing a signal (PP0; Column G), the posterior probability of only the eQTL having a signal (PP1; Column H), posterior probability of only the GWAS having a signal (PP2; Column I), posterior probability of both the GWAS and eQTL having a signal, but the causal variant is different (PP3; Column J), posterior probability of both the GWAS and eQTL having a shared causal variant (PP4; Column K), and the posterior probability of the SNP (Column L). We also include the p-value for each cell type used as covariates included in the model for the eQTL analysis: collapsed epidermal cells (Column M), inner bulge cell (Column N), and Leukocyte (Column O). Only eGenes with PP4 > 0.1 are shown.
